# Supplementary material for: Building a translational cancer dependency map for The Cancer Genome Atlas
Source: PubMed Central journal article supplement (PMC11358024; doi:10.1038/s43018-024-00789-y), 2024-07-15

Figure 4 H. Uncropped photographs

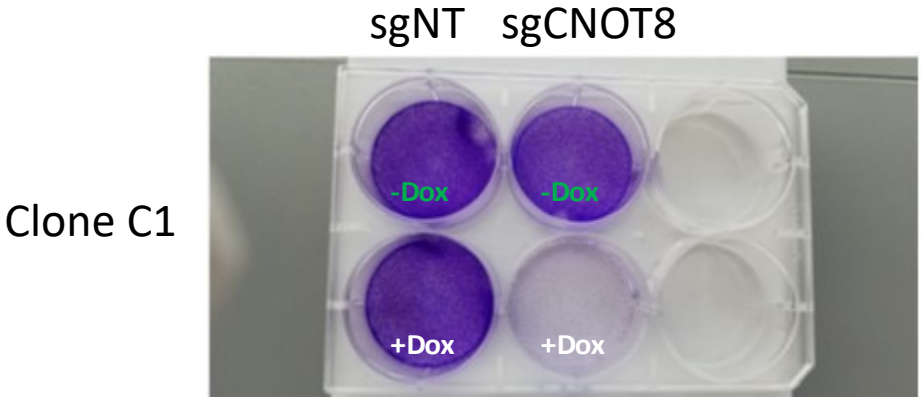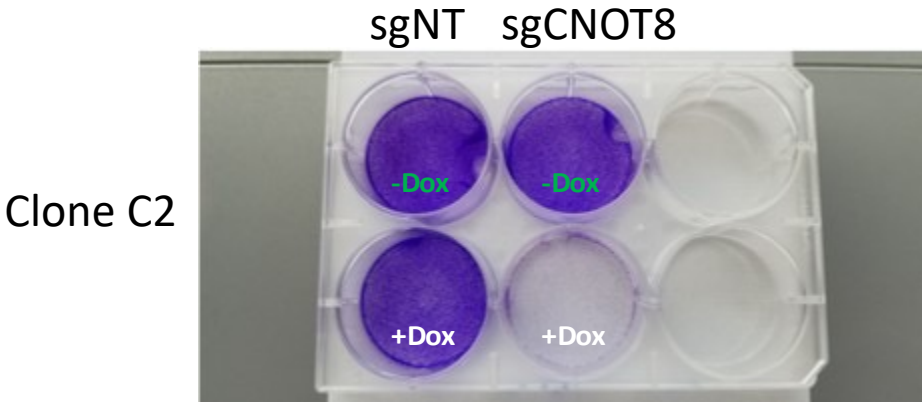

Supplement: 43018_2024_789_MOESM13_ESM.pdf [file 43018_2024_789_MOESM13_ESM.pdf]
