# Supplementary material for: Building a translational cancer dependency map for The Cancer Genome Atlas
Source: PubMed Central journal article supplement (PMC11358024; doi:10.1038/s43018-024-00789-y), 2024-07-15

Extended Figure 3J.

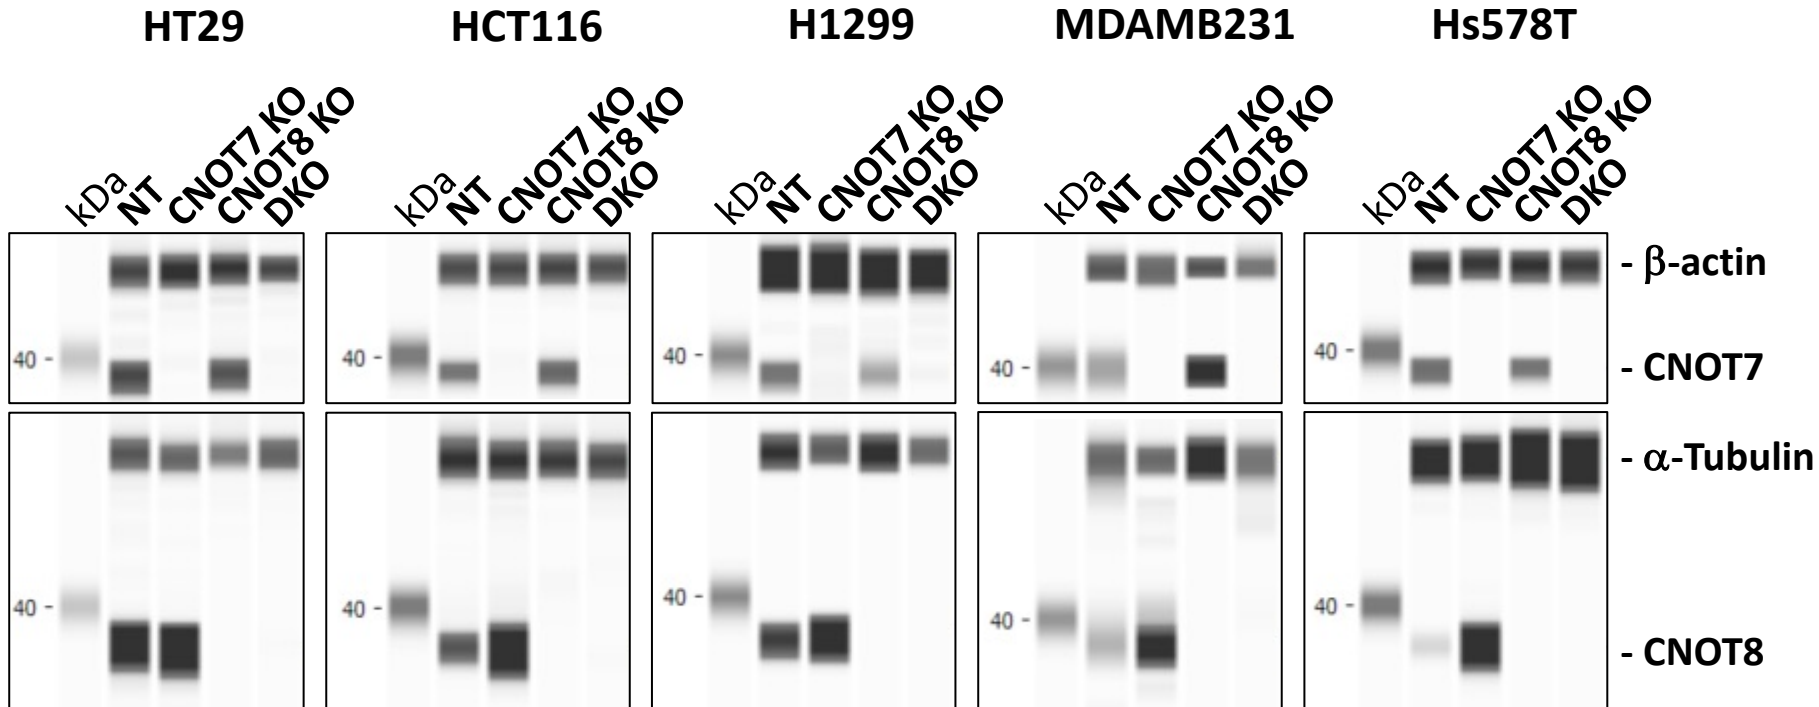

Extended Figure 3J – uncropped for source data: HT29

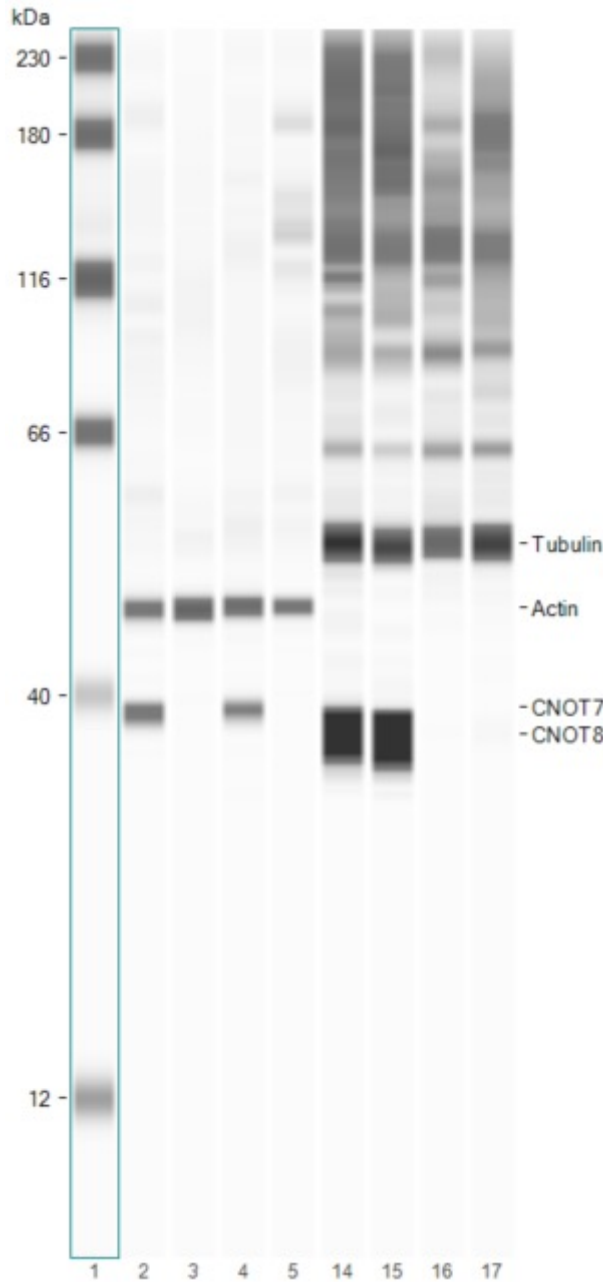

Extended Figure 3J – uncropped for source data: HCT116

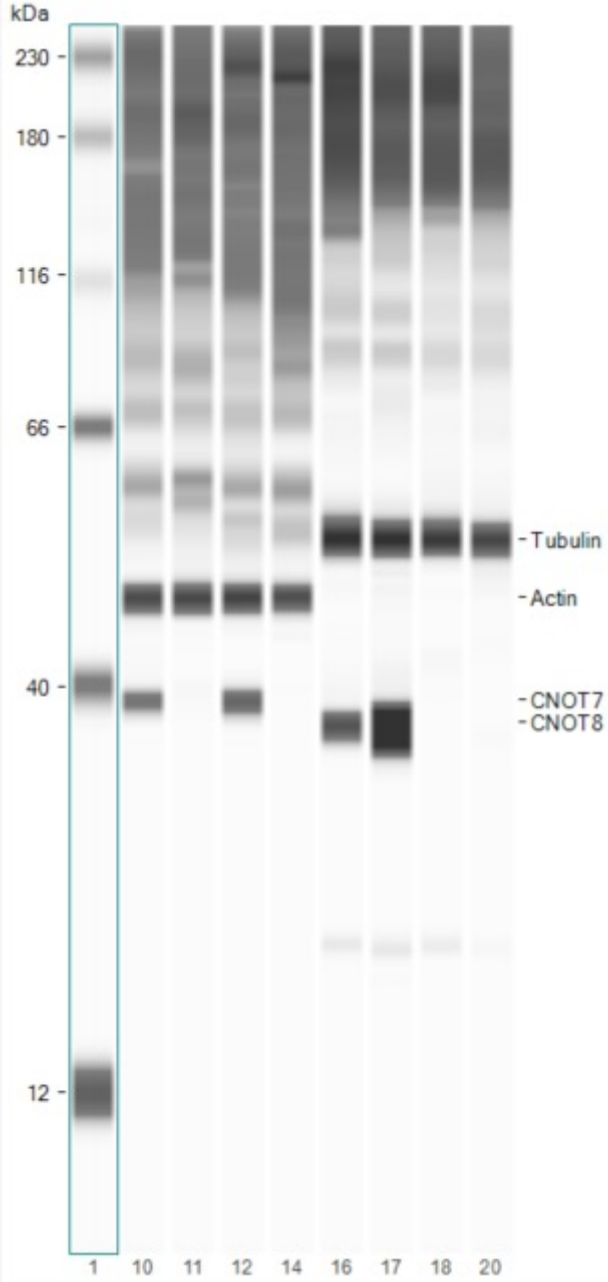

Extended Figure 3J – uncropped for source data: Hs578T

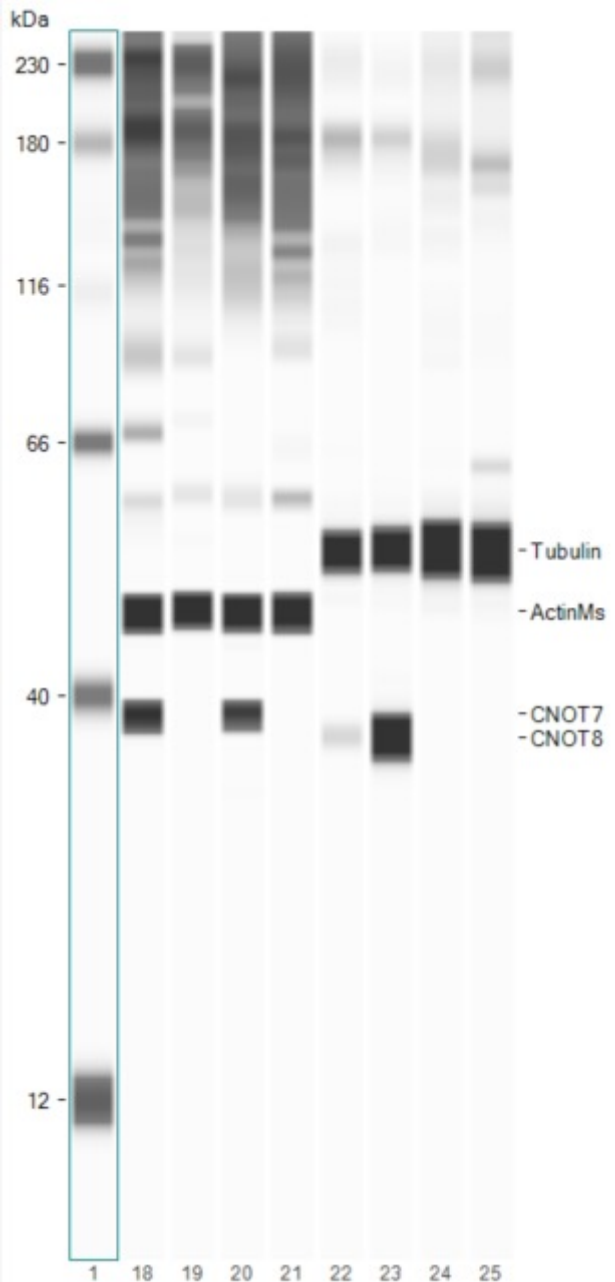







Updated Extended Figure 4H

Editable

Flattened

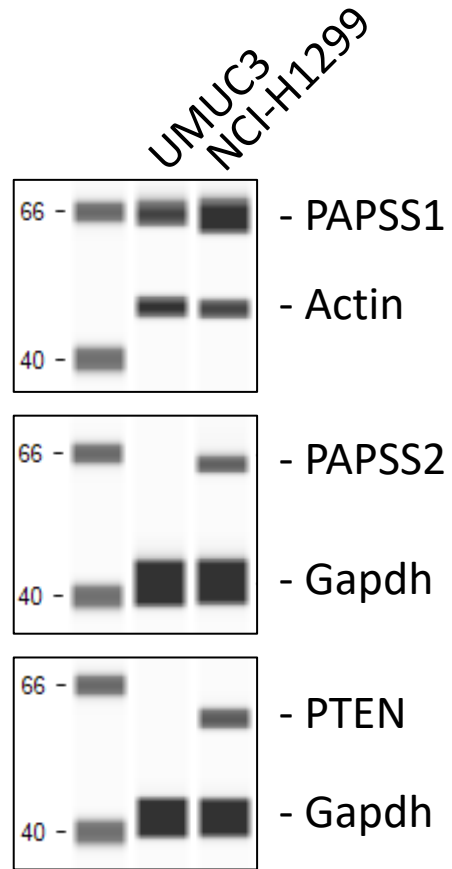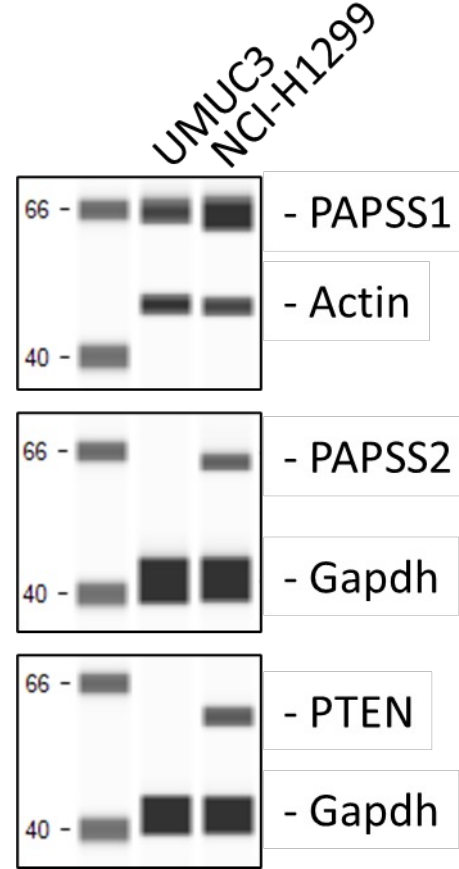



Extended Data Figure 4H – uncropped for source data

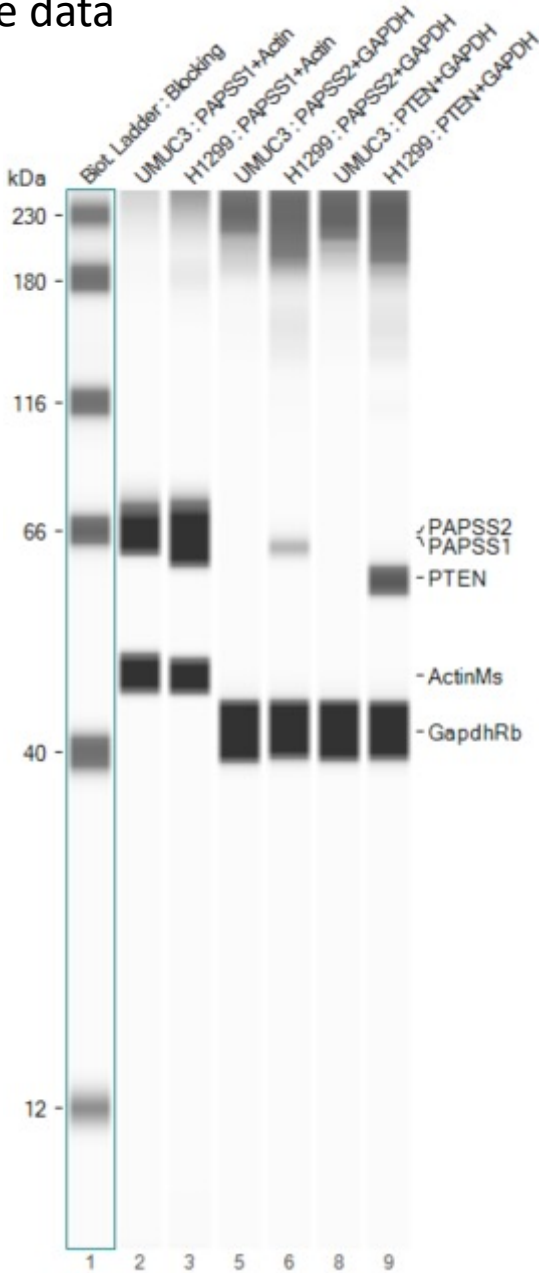

Extended Data Figure 4I – uncropped for source data

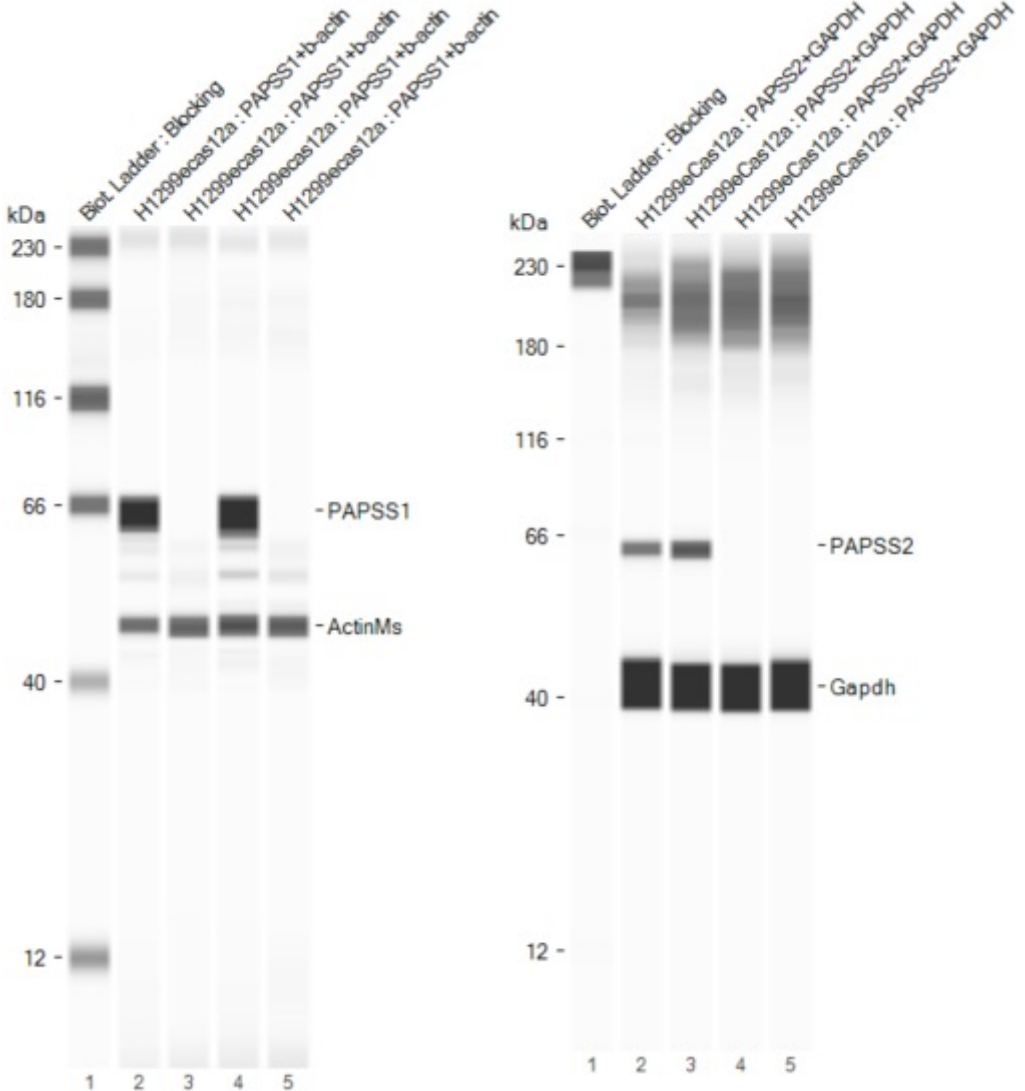

Extended Data Figure 4J – uncropped for source data

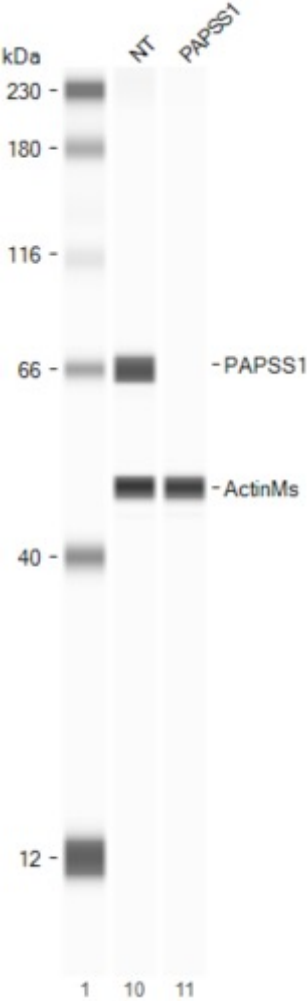

Extended Data Figure 4K – uncropped for source data

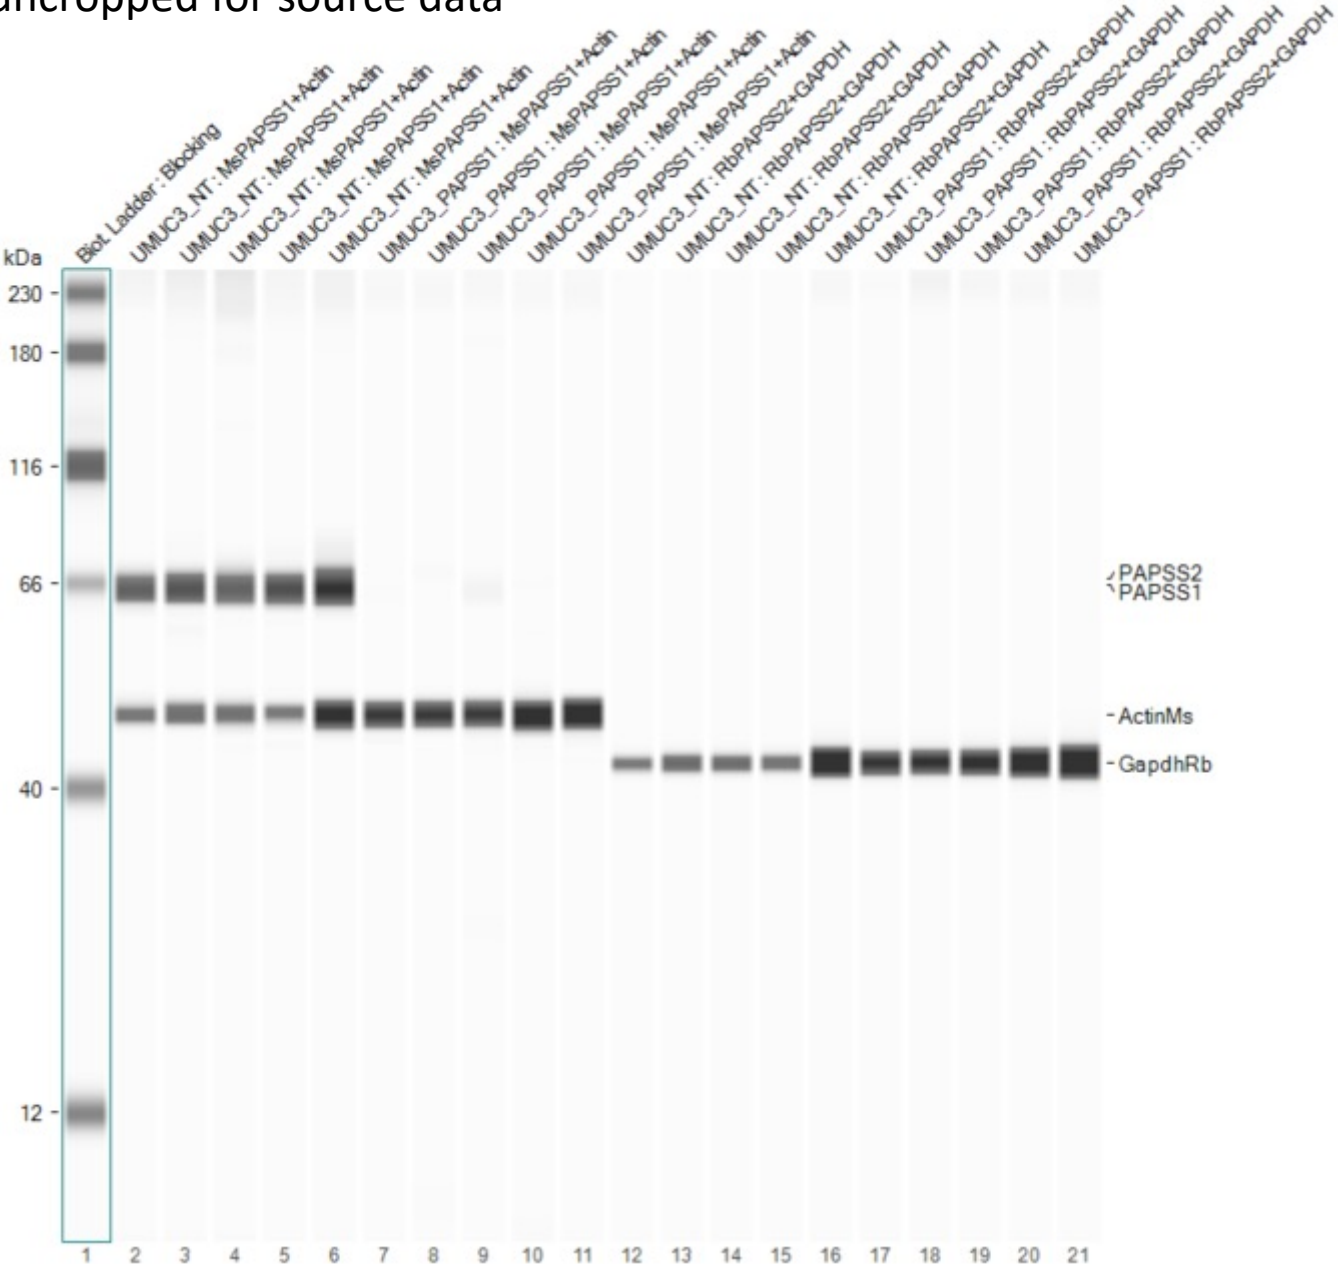

Supplement: 43018_2024_789_MOESM23_ESM.pdf [file 43018_2024_789_MOESM23_ESM.pdf]
